# Supplementary material for: A synthesis of European seahorse taxonomy, population structure, and habitat use as a basis for assessment, monitoring and conservation
Source: PubMed Central journal article supplement (PMC5717113; doi:10.1007/s00227-017-3274-y), 2017-12-05
Supplement: 227_2017_3274_MOESM1_ESM.pdf [file 227_2017_3274_MOESM1_ESM.pdf]

Figure S1: Photos to illustrate the morphological variation across species and the distinguishing morphological characteristics

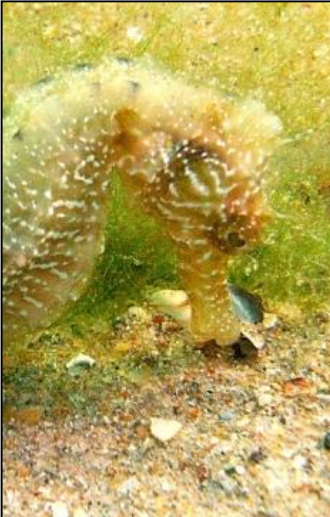

Bulgaria

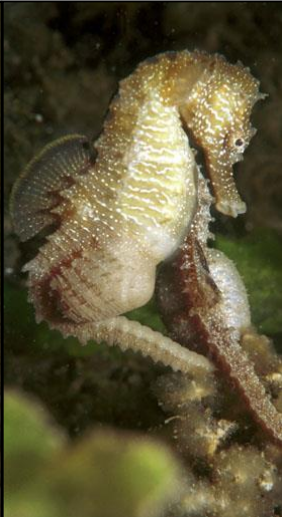

Southern France

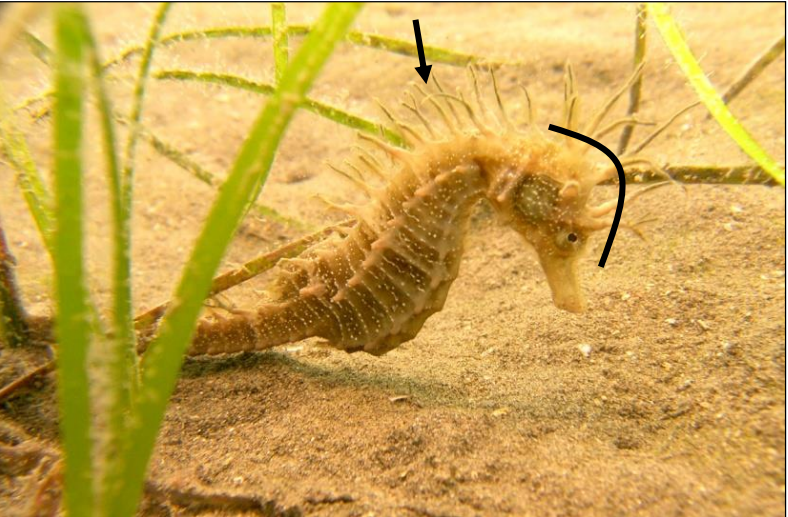

Southern Spain

*Hippocampus guttulatus*

Note the curved head shape and when present thick cirri with few branches

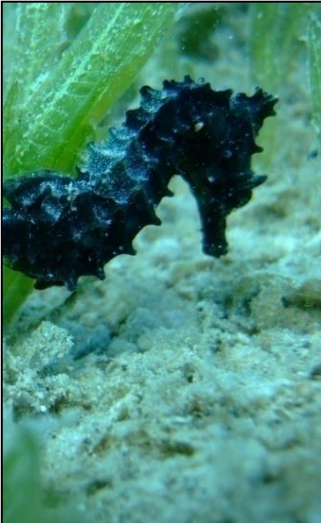

Greece

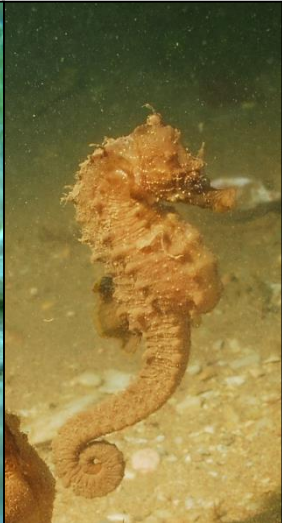

United Kingdom

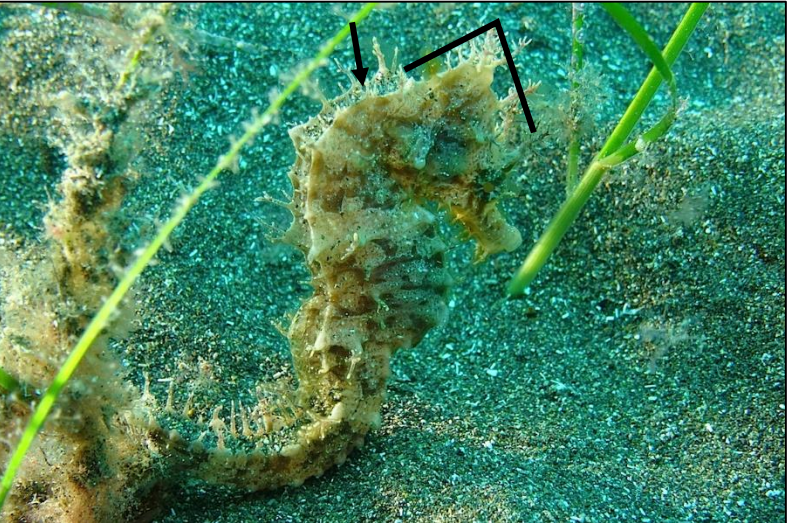

Canary Islands

*Hippocampus hippocampus*

Note the triangular head shape and when present thin cirri with many branches
